# Supplementary material for: CCN1/Integrin α5β1 Instigates Free Fatty Acid-Induced Hepatocyte Lipid Accumulation and Pyroptosis through NLRP3 Inflammasome Activation
Source: MDPI journal article supplement (doi:10.3390/nu14183871), 2022-09-19
Supplement: s1 [file s1]

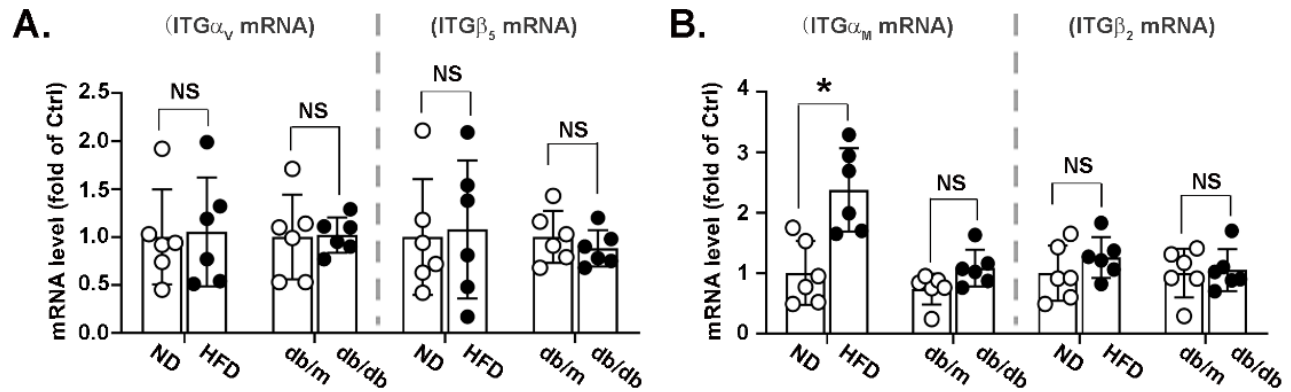

**Figure S1. Expression of integrin  $\alpha_v\beta_5$  and  $\alpha_M\beta_2$  in the livers of obese mice.** Mice fed a ND or HFD for 16 weeks (n=6 in each group) and db/db and db/m mice (8 weeks old, n=6 in each group) were sacrificed. The livers were immediately dissected and subjected to quick-freezing in liquid nitrogen. The mRNA levels of integrin  $\alpha_v\beta_5$  (A) and  $\alpha_M\beta_2$  (B) were measured by RT-qPCR. \*p<0.05.

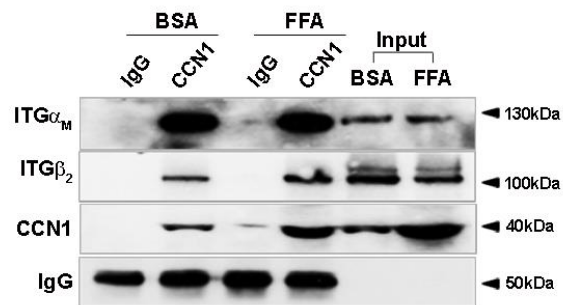

**Figure S2. Effects of FFA on binding of CCN1 to integrin  $\alpha_M\beta_2$ .** Immunoblotting (integrin  $\alpha_M$  and  $\beta_2$ ) of whole cell lysates (input) and immunoprecipitates (CCN1) from LO2 hepatocytes with or without FFA (1 mM) treatment for 24 h. Immunoblots shown are representative of three independent experiments.
